# Supplementary material for: Quality Assurance of Non-Invasive Prenatal Screening (NIPS) for Fetal Aneuploidy Using Positive Predictive Values as Outcome Measures
Source: MDPI journal article supplement (doi:10.3390/jcm8091311), 2019-08-26

Supplemental Methods 1. Information request form for cases selected for follow-up

Patient Name: \_\_\_\_\_ Date of Birth: \_\_\_\_\_  
Panorama Result: **High Risk for** \_\_\_\_\_ Natera Case ID: **received in lab on** \_\_\_\_\_

**1. Were anomalies identified on ultrasound?**

Yes  No

**1a) If yes, please select the systems affected and specify anomaly:**

|                                            |                                              |
|--------------------------------------------|----------------------------------------------|
| <input type="checkbox"/> Heart:            | <input type="checkbox"/> Liver:              |
| <input type="checkbox"/> Brain:            | <input type="checkbox"/> Skeletal:           |
| <input type="checkbox"/> Kidney:           | <input type="checkbox"/> Facial:             |
| <input type="checkbox"/> Placenta:         | <input type="checkbox"/> Growth retardation: |
| <input type="checkbox"/> Pulmonary:        | <input type="checkbox"/> Hands or feet:      |
| <input type="checkbox"/> Gastrointestinal: | <input type="checkbox"/> Soft markers:       |
| <input type="checkbox"/> Increased NT:     | <input type="checkbox"/> Other:              |

**2. Did the patient have any of the following diagnostic tests?**

|                                                        |                                               |                                                          |
|--------------------------------------------------------|-----------------------------------------------|----------------------------------------------------------|
| <input type="checkbox"/> Amniocentesis                 | <input type="checkbox"/> CVS                  | <input type="checkbox"/> No diagnostic testing performed |
| <input type="checkbox"/> Product of conception testing | <input type="checkbox"/> Postnatal/cord blood |                                                          |

**2a) If Diagnostic testing was performed, what were the results of the diagnostic testing?**  Not Applicable

Confirmed affected  Trisomy 21  Trisomy 18  Trisomy 13  Monosomy X  Other: \_\_\_\_\_  
Was the condition mosaic?  Yes \_\_\_\_\_%  No

Normal Chromosomes

**2b) Which method was used to confirm this finding?**

|                                    |                                         |
|------------------------------------|-----------------------------------------|
| <input type="checkbox"/> FISH/RAD  | <input type="checkbox"/> Microarray/CMA |
| <input type="checkbox"/> Karyotype | <input type="checkbox"/> Physical Exam  |
| <input type="checkbox"/> Other:    |                                         |

**3. What was the pregnancy outcome?**

|                                                        |                                                                                                                   |
|--------------------------------------------------------|-------------------------------------------------------------------------------------------------------------------|
| <input type="checkbox"/> Live birth with anomaly       | <input type="checkbox"/> Lost to follow-up                                                                        |
| <input type="checkbox"/> Live birth normal             | <input type="checkbox"/> Miscarriage 14-28 weeks                                                                  |
| <input type="checkbox"/> Miscarriage <14 weeks         | <input type="checkbox"/> Termination If yes, reason:                                                              |
| <input type="checkbox"/> Intrauterine demise >28 weeks | <input type="checkbox"/> Personal <input type="checkbox"/> Fetal anomaly <input type="checkbox"/> Maternal Health |
| <input type="checkbox"/> Neonatal death                |                                                                                                                   |
| <input type="checkbox"/> Other:                        |                                                                                                                   |

In the case of a pregnancy loss, was testing performed on the products of conception? Results?

**4. Was testing performed after the child's birth?**  Yes  No

Was the child a male or female? \_\_\_\_\_

Was the child affected with a chromosome abnormality?  Yes; Diagnosis? \_\_\_\_\_  No

Additional comments or relevant information about the pregnancy:

## Supplemental Methods 2. The design of the non-inferiority test.

The non-inferiority test is based on the hypothesis there is a fixed PPV for each chromosome abnormality. For a given fixed sample size of cases with follow-up, there is a minimum number of positive calls that would lead to rejection of the (null) hypothesis that the true PPV is less than either 70% or 80% of the expected PPV. Rejecting this type of null hypothesis enables one to claim that one has found statistical evidence that the true PPV is more than a chosen percentage of the target PPV. The required sample size is based on a requirement of 95% statistical power.

Expected PPVs for each chromosome abnormality were based on initial observations with the test SNP based NIPT. Due to increased pregnancy loss rates, lower disease prevalence, less robust initial estimates of the expected PPV, and sufficient pregnancy outcome data, the decision rule analysis was not applied to trisomy 13 and monosomy X. Supplemental Table 1 summarizes the target PPVs when applying the requirement of 70% or 80% PPV. Supplemental Tables 2 and 3 shows the number of cases that would need to be confirmed as true positive out of the total number with follow-up (N) to conclude that the testing was not inferior to that required.

Supplemental Table S1. Ultrasound findings considered to be sufficient for confirming a true positive trisomy

| Trimester | Type* | Trisomy 21                                                                                                        | Trisomy 18                                        | Trisomy 13                                                                                    | Monosomy X                                                      |
|-----------|-------|-------------------------------------------------------------------------------------------------------------------|---------------------------------------------------|-----------------------------------------------------------------------------------------------|-----------------------------------------------------------------|
| 1st       | Minor | Hypoplastic nasal bone                                                                                            | Hypoplastic nasal bone                            |                                                                                               |                                                                 |
| 1st       | Major | NT≥3 mm; cystic hygroma                                                                                           | NT≥3 mm; cystic hygroma; anencephaly; omphalocele | NT≥3 mm; holoprosencephaly; omphalocele, megacystis                                           | NT≥3 mm; cystic hygroma                                         |
| 2nd       | Minor | EIF; pyelectasis ≥4 mm; 10-15 mm ventriculomegaly; CPC; shortened femur/humerus; increased BPD/FL; polyhydramnios | CPC; rocker bottom feet; clenched hands           | polydactyly                                                                                   | Thickened NF; shortened humerus/femur; fetal growth restriction |
| 2nd       | Major | NF≥7 mm; CHD; “double-bubble” sign; cystic hygroma                                                                | Fetal growth restriction; NTD; CHD; omphalocele   | Midline intracranial anomaly; midline or lateral cleft lip/palate; CHD; omphalocele; clubfeet | Cystic hygroma; CHD; kidney malformation; hydrops               |
| 3rd       | Minor | pyelectasis≥7 mm; + everything noted in 2 <sup>nd</sup> trimester                                                 | See second trimester                              | See second trimester                                                                          | See second trimester                                            |
| 3rd       | Major | See second trimester                                                                                              | See second trimester                              | See second trimester                                                                          | See second trimester                                            |

\*At least one major, or two minor, ultrasound findings needed to be present in each case to be considered a true positive

Supplemental Table S2. PPVs required to meet the non-inferiority thresholds of 70% and 80% of that established for the test based on a prior publication.

| Trisomy | Historic PPV <sup>1</sup> | 70% of Historic PPV | 80% of Historic PPV |
|---------|---------------------------|---------------------|---------------------|
| 21      | 90%                       | 63%                 | 72%                 |
| 18      | 93%                       | 65%                 | 74%                 |

<sup>1</sup>Historic PPV based Dar P, Curnow KJ, Gross SJ, et al. Clinical experience and follow-up with large scale single-nucleotide polymorphism-based noninvasive prenatal aneuploidy testing. Am J Obstet Gynecol. 2014 Nov;211(5):527.e1-527.e17.

Supplemental Table S3: Number of cases need with follow-up and the number of true positives needed to meet non-inferiority for trisomy 21.

| N  | 70%<br>Noninferiority      | 80%<br>Noninferiority      |
|----|----------------------------|----------------------------|
|    | Min Confirmed<br>Positives | Min Confirmed<br>Positives |
| 29 | 23                         | NA                         |
| 30 | 24                         | NA                         |
| 31 | 25                         | NA                         |
| 32 | 26                         | NA                         |
| 33 | 26                         | NA                         |
| 34 | 27                         | NA                         |
| 35 | 28                         | NA                         |
| 36 | 28                         | NA                         |
| 37 | 29                         | NA                         |
| 38 | 30                         | NA                         |
| 39 | 30                         | NA                         |
| 40 | 31                         | NA                         |
| 41 | 32                         | NA                         |
| 42 | 33                         | NA                         |
| 43 | 33                         | NA                         |
| 44 | 34                         | NA                         |
| 45 | 35                         | NA                         |
| 46 | 35                         | NA                         |
| 47 | 36                         | NA                         |
| 48 | 37                         | NA                         |
| 49 | 37                         | NA                         |
| 50 | 38                         | NA                         |
| 51 | 39                         | NA                         |
| 52 | 39                         | NA                         |
| 53 | 40                         | 44                         |
| 54 | 41                         | 45                         |
| 55 | 41                         | 46                         |
| 56 | 42                         | 47                         |
| 57 | 43                         | 47                         |
| 58 | 43                         | 48                         |
| 59 | 44                         | 49                         |

|    |    |    |
|----|----|----|
| 60 | 45 | 50 |
| 61 | 46 | 51 |
| 62 | 46 | 51 |
| 63 | 47 | 52 |
| 64 | 48 | 53 |
| 65 | 48 | 54 |
| 66 | 49 | 54 |
| 67 | 50 | 55 |
| 68 | 50 | 56 |
| 69 | 51 | 57 |
| 70 | 52 | 57 |
| 71 | 52 | 58 |
| 72 | 53 | 59 |
| 73 | 54 | 60 |
| 74 | 54 | 60 |
| 75 | 55 | 61 |
| 76 | 56 | 62 |
| 77 | 56 | 63 |
| 78 | 57 | 64 |
| 79 | 58 | 64 |
| 80 | 58 | 65 |
| 81 | 59 | 66 |
| 82 | 60 | 67 |
| 83 | 60 | 67 |
| 84 | 61 | 68 |
| 85 | 62 | 69 |
| 86 | 62 | 70 |
| 87 | 63 | 70 |
| 88 | 64 | 71 |
| 89 | 64 | 72 |
| 90 | 65 | 73 |
| 91 | 66 | 73 |
| 92 | 66 | 74 |
| 93 | 67 | 75 |
| 94 | 68 | 76 |
| 95 | 69 | 76 |
| 96 | 69 | 77 |
| 97 | 70 | 78 |
| 98 | 71 | 79 |

Supplemental Table S4: Number of cases need with follow-up and the number of true positives needed to meet non-inferiority for trisomy 18.

| N  | 70%<br>Noninferiority      | 80%<br>Noninferiority      |
|----|----------------------------|----------------------------|
|    | Min Confirmed<br>Positives | Min Confirmed<br>Positives |
| 24 | 20                         | NA                         |
| 25 | 21                         | NA                         |
| 26 | 22                         | NA                         |
| 27 | 23                         | NA                         |
| 28 | 23                         | NA                         |
| 29 | 24                         | NA                         |
| 30 | 25                         | NA                         |
| 31 | 25                         | NA                         |
| 32 | 26                         | NA                         |
| 33 | 27                         | NA                         |
| 34 | 28                         | NA                         |
| 35 | 28                         | NA                         |
| 36 | 29                         | NA                         |
| 37 | 30                         | NA                         |
| 38 | 30                         | NA                         |
| 39 | 31                         | NA                         |
| 40 | 32                         | NA                         |
| 41 | 33                         | NA                         |
| 42 | 33                         | NA                         |
| 43 | 34                         | NA                         |
| 44 | 35                         | 38                         |
| 45 | 35                         | 39                         |
| 46 | 36                         | 40                         |
| 47 | 37                         | 41                         |
| 48 | 38                         | 42                         |
| 49 | 38                         | 42                         |
| 50 | 39                         | 43                         |
| 51 | 40                         | 44                         |
| 52 | 40                         | 45                         |
| 53 | 41                         | 45                         |
| 54 | 42                         | 46                         |
| 55 | 43                         | 47                         |

Supplemental Figure S1. Positive predictive rates by quarter, 2014-2017.

(a) Trisomy 21

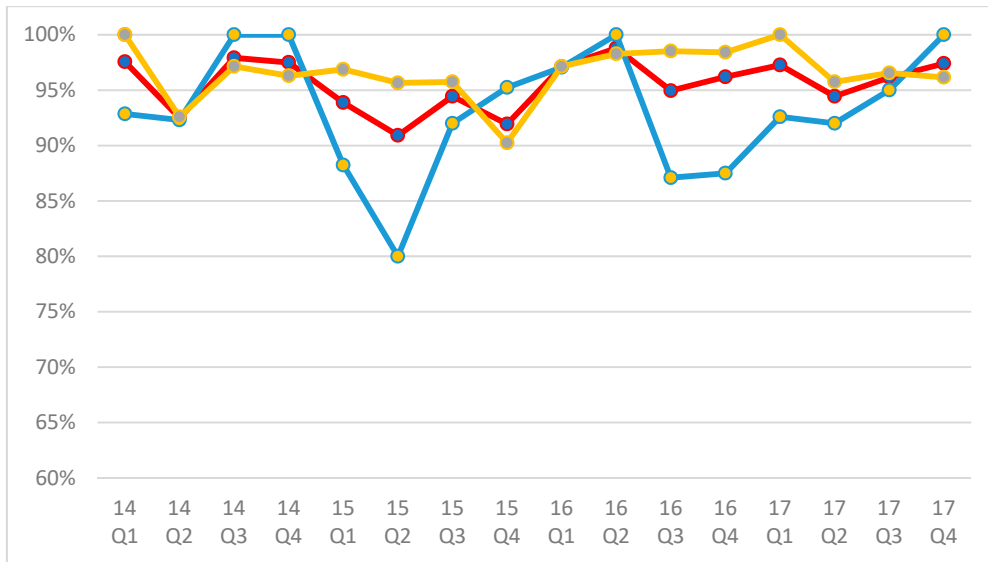

(b) Trisomy 18, trisomy 13, or monosomy X combined

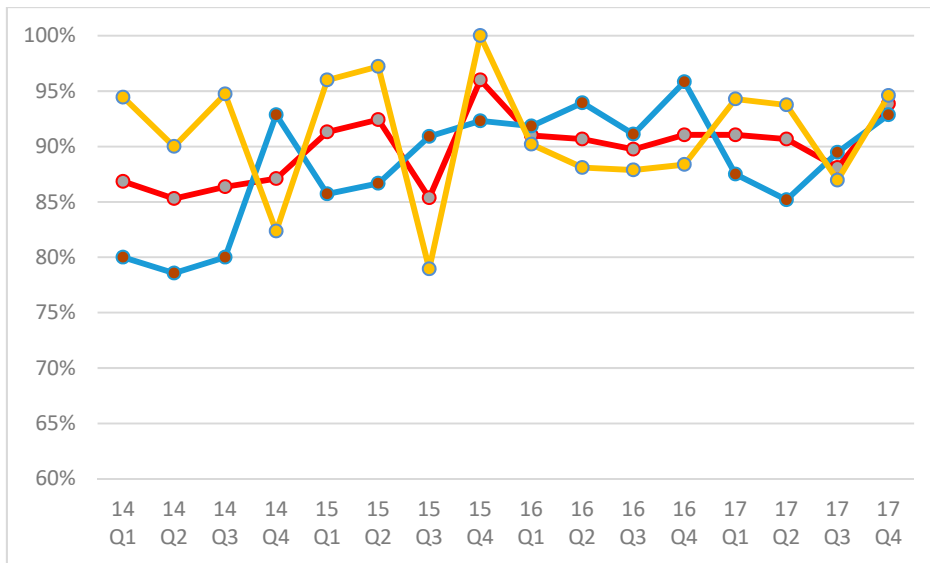

Blue = women <35; Yellow women ≥35; Red all referrals combined



Supplemental Figure S2. Rate of false-negative results (trisomies 21, 18, 13 and monosomy X combined) reported to the laboratory for each quarter.

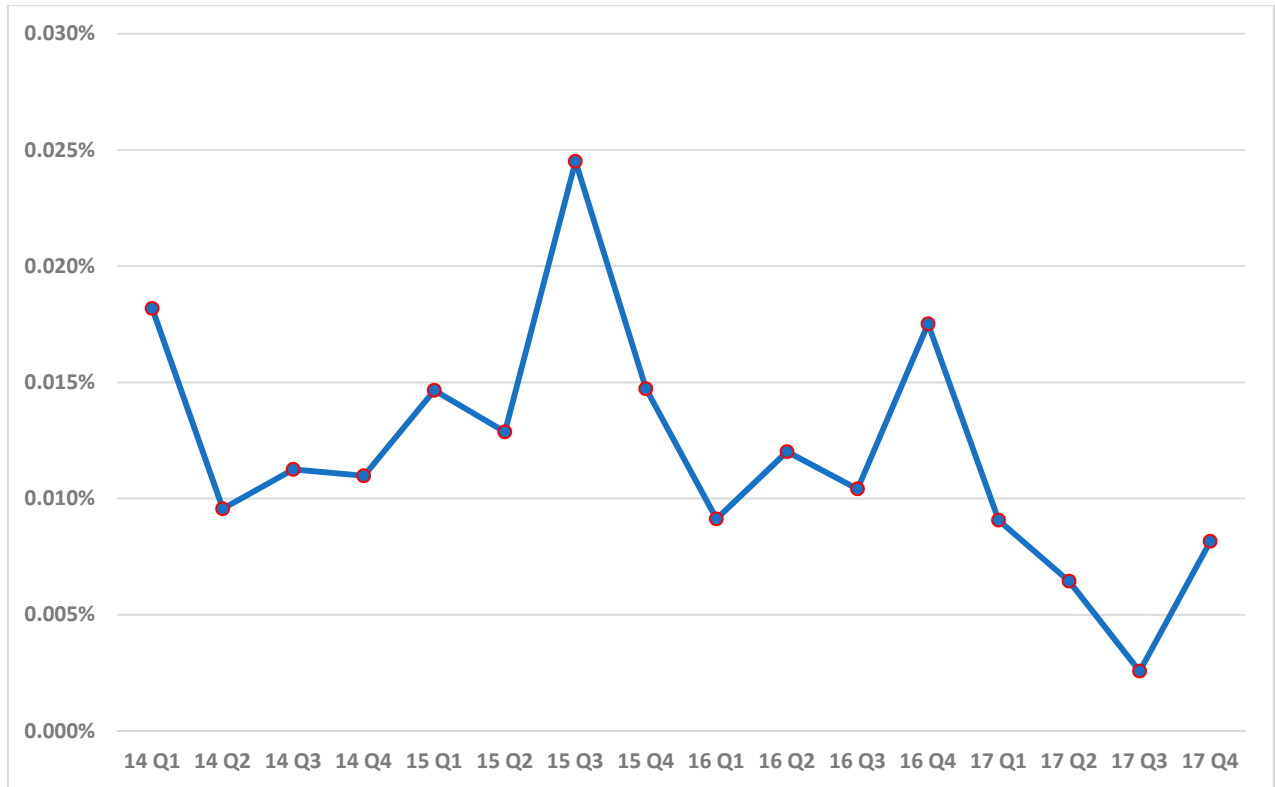

Supplement: s1 [file s1]
